# Supplementary material for: Effects of Preoperative Intraocular Pressure Level on Surgical Results of Microhook Ab Interno Trabeculotomy
Source: MDPI journal article supplement (doi:10.3390/jcm10153327), 2021-07-28
Supplement: s1 [file s1]

**Supplementary Table S1:** Pre- and 12 months post-operative IOPs in current and previous studies of ab interno goniotomy procedures reported in subjects group including POAG

| Procedure | Combined CE | Preoperative IOP (mmHg) | Postoperative IOP (mmHg) | Difference (mmHg) | %IOP reduction | Reference     |
|-----------|-------------|-------------------------|--------------------------|-------------------|----------------|---------------|
| μLOT      | mix         | 18.8                    | 12.9                     | 5.9               | 31             | Current study |
| μLOT      | combined    | 19.3                    | 12.8                     | 6.5               | 34             | <sup>1</sup>  |
| μLOT      | solo        | 22.4                    | 14.4                     | 8                 | 36             | <sup>1</sup>  |
| μLOT      | mix         | 28.5                    | 15                       | 13.5              | 47             | <sup>2</sup>  |
| μLOT      | mix         | 27                      | 16                       | 11                | 41             | <sup>2</sup>  |
| μLOT      | combined    | 20.5                    | 13.9                     | 6.6               | 32             | <sup>3</sup>  |
| μLOT      | combined    | 24.7                    | 13                       | 11.7              | 47             | <sup>4</sup>  |
| μLOT      | mix         | 24.1                    | 12.5                     | 11.6              | 48             | <sup>5</sup>  |
| μLOT      | mix         | 28.4                    | 17.8                     | 10.6              | 37             | <sup>6</sup>  |
| KDB       | combined    | 22.3                    | 13.6                     | 8.7               | 39             | <sup>3</sup>  |
| KDB       | combined    | 23.2                    | 16.7                     | 6.5               | 28             | <sup>4</sup>  |
| KDB       | combined    | 24                      | 17.2                     | 6.8               | 28             | <sup>7</sup>  |
| KDB       | combined    | 14.8                    | 13.1                     | 1.7               | 11             | <sup>8</sup>  |
| KDB       | combined    | 21.3                    | 13.5                     | 7.8               | 37             | <sup>8</sup>  |
| KDB       | solo        | 21.6                    | 16.5                     | 5.1               | 24             | <sup>9</sup>  |
| KDB       | combined    | 19.8                    | 13.4                     | 6.4               | 32             | <sup>10</sup> |
| KDB       | combined    | 16.5                    | 14.1                     | 2.4               | 15             | <sup>11</sup> |
| KDB       | solo        | 24.3                    | 16.9                     | 7.4               | 30             | <sup>11</sup> |
| KDB       | combined    | 18.5                    | 15.4                     | 3.1               | 17             | <sup>12</sup> |
| KDB       | mix         | 17.1                    | 14.7                     | 2.4               | 14             | <sup>13</sup> |
| KDB       | combined    | 18.2                    | 13.2                     | 5                 | 27             | <sup>14</sup> |
| KDB       | combined    | 17.4                    | 15                       | 2.4               | 14             | <sup>15</sup> |
| KDB       | combined    | 16.8                    | 12.4                     | 4.4               | 26             | <sup>16</sup> |
| KDB       | combined    | 16.7                    | 13.8                     | 2.9               | 17             | <sup>17</sup> |
| KDB       | solo        | 20.4                    | 14.1                     | 6.3               | 31             | <sup>17</sup> |

|      |          |      |      |      |    |               |
|------|----------|------|------|------|----|---------------|
| GATT | mix      | 18.7 | 13.8 | 4.9  | 26 | <sup>18</sup> |
| GATT | mix      | 18.7 | 13.9 | 4.8  | 26 | <sup>18</sup> |
| GATT | mix      | 18.3 | 13.3 | 5    | 27 | <sup>18</sup> |
| GATT | mix      | 28.3 | 13.3 | 15   | 53 | <sup>19</sup> |
| GATT | combined | 22.7 | 13.5 | 9.2  | 41 | <sup>20</sup> |
| GATT | solo     | 24.9 | 14.3 | 10.6 | 43 | <sup>20</sup> |
| GATT | solo     | 27.4 | 14.4 | 13   | 47 | <sup>21</sup> |
| GATT | combined | 24.7 | 16.3 | 8.4  | 34 | <sup>22</sup> |
| GATT | solo     | 26   | 16.4 | 9.6  | 37 | <sup>22</sup> |
| GATT | combined | 21.9 | 12   | 9.9  | 45 | <sup>23</sup> |
| GATT | solo     | 26.6 | 14.7 | 11.9 | 45 | <sup>23</sup> |
| GATT | combined | 23.9 | 15.5 | 8.4  | 35 | <sup>24</sup> |
| GATT | solo     | 25.6 | 15.7 | 9.9  | 39 | <sup>24</sup> |
| TOM  | mix      | 24.6 | 13.3 | 11.3 | 46 | <sup>5</sup>  |
| TOM  | mix      | 15.3 | 12.5 | 2.8  | 18 | <sup>25</sup> |
| TOM  | mix      | 22   | 13   | 9    | 41 | <sup>25</sup> |
| TOM  | mix      | 31.9 | 13.5 | 18.4 | 58 | <sup>25</sup> |
| TOM  | mix      | 22.3 | 16   | 6.3  | 28 | <sup>26</sup> |
| TOM  | combined | 18.3 | 13.3 | 5    | 27 | <sup>27</sup> |
| TOM  | combined | 15.3 | 13.3 | 2    | 13 | <sup>28</sup> |
| TOM  | combined | 19.3 | 13.8 | 5.5  | 28 | <sup>29</sup> |
| TOM  | mix      | 23   | 16.8 | 6.2  | 27 | <sup>30</sup> |
| TOM  | combined | 20   | 16.8 | 3.2  | 16 | <sup>31</sup> |
| TOM  | mix      | 20   | 13.6 | 6.4  | 32 | <sup>32</sup> |
| TOM  | mix      | 21.2 | 16.1 | 5.1  | 24 | <sup>33</sup> |
| TOM  | mix      | 21.2 | 15.7 | 5.5  | 26 | <sup>33</sup> |
| TOM  | mix      | 21.4 | 16.5 | 4.9  | 23 | <sup>34</sup> |
| TOM  | mix      | 24   | 16.1 | 7.9  | 33 | <sup>35</sup> |
| TOM  | mix      | 22.6 | 15.7 | 6.9  | 31 | <sup>35</sup> |
| TOM  | mix      | 23.6 | 15   | 8.6  | 36 | <sup>36</sup> |

|     |          |      |      |      |    |               |
|-----|----------|------|------|------|----|---------------|
| TOM | mix      | 22.6 | 15.8 | 6.8  | 30 | <sup>37</sup> |
| TOM | solo     | 19.1 | 14.4 | 4.7  | 25 | <sup>38</sup> |
| TOM | solo     | 22.5 | 13.7 | 8.8  | 39 | <sup>38</sup> |
| TOM | mix      | 23.6 | 16   | 7.6  | 32 | <sup>39</sup> |
| TOM | mix      | 37.6 | 16.9 | 20.7 | 55 | <sup>40</sup> |
| TOM | combined | 18.3 | 13.5 | 4.8  | 26 | <sup>41</sup> |
| TOM | combined | 18.1 | 15.2 | 2.9  | 16 | <sup>42</sup> |
| TOM | combined | 19.3 | 15.6 | 3.7  | 19 | <sup>42</sup> |
| TOM | combined | 19.2 | 15.1 | 4.1  | 21 | <sup>42</sup> |
| TOM | combined | 25.7 | 16.4 | 9.3  | 36 | <sup>42</sup> |
| TOM | combined | 20.9 | 16   | 4.9  | 23 | <sup>43</sup> |
| TOM | combined | 22.3 | 15.6 | 6.7  | 30 | <sup>44</sup> |
| TOM | mix      | 19.6 | 15.7 | 3.9  | 20 | <sup>45</sup> |
| TOM | mix      | 21.6 | 15.9 | 5.7  | 26 | <sup>45</sup> |
| TOM | mix      | 24.5 | 16.2 | 8.3  | 34 | <sup>45</sup> |
| TOM | mix      | 29   | 16.7 | 12.3 | 42 | <sup>45</sup> |
| TOM | solo     | 20.7 | 16.2 | 4.5  | 22 | <sup>46</sup> |
| TOM | solo     | 23   | 16.4 | 6.6  | 29 | <sup>46</sup> |
| TOM | solo     | 26.1 | 16.6 | 9.5  | 36 | <sup>46</sup> |
| TOM | solo     | 29.1 | 16.7 | 12.4 | 43 | <sup>46</sup> |
| TOM | mix      | 31.6 | 16.4 | 15.2 | 48 | <sup>47</sup> |
| TOM | solo     | 21.7 | 15.9 | 5.8  | 27 | <sup>48</sup> |
| TOM | combined | 19.7 | 15.5 | 4.2  | 21 | <sup>48</sup> |
| TOM | solo     | 28.8 | 17.1 | 11.7 | 41 | <sup>49</sup> |
| TOM | solo     | 22.3 | 15.1 | 7.2  | 32 | <sup>50</sup> |
| TOM | mix      | 19.3 | 14.6 | 4.7  | 24 | <sup>51</sup> |
| TOM | solo     | 27.3 | 15.7 | 11.6 | 42 | <sup>52</sup> |
| TOM | solo     | 26.1 | 16.4 | 9.7  | 37 | <sup>52</sup> |
| TOM | combined | 20.7 | 15.7 | 5    | 24 | <sup>52</sup> |
| TOM | combined | 22.6 | 17   | 5.6  | 25 | <sup>52</sup> |

|     |          |      |      |      |    |               |
|-----|----------|------|------|------|----|---------------|
| TOM | solo     | 25.9 | 19.3 | 6.6  | 25 | <sup>53</sup> |
| TOM | combined | 16.5 | 14.6 | 1.9  | 12 | <sup>53</sup> |
| TOM | solo     | 25.5 | 18   | 7.5  | 29 | <sup>54</sup> |
| TOM | combined | 19.9 | 15.8 | 4.1  | 21 | <sup>54</sup> |
| TOM | combined | 20   | 14.8 | 5.2  | 26 | <sup>55</sup> |
| TOM | mix      | 25.7 | 16.1 | 9.6  | 37 | <sup>56</sup> |
| TOM | mix      | 27.6 | 16.4 | 11.2 | 41 | <sup>57</sup> |
| TOM | solo     | 28.2 | 16.3 | 11.9 | 42 | <sup>58</sup> |

IOP, intraocular pressure; POAG, primary open angle glaucoma;  $\mu$ LOT, microhook trabeculotomy; KDB, Kahook Dual Blade; GATT, gonioscopy-assisted transluminal trabeculotomy; TOM, Trabectome; CE, cataract extraction.

#### Reference

1. Tanito M, Sugihara K, Tsutsui A, et al. Midterm Results of Microhook ab Interno Trabeculotomy in Initial 560 Eyes with Glaucoma. *J Clin Med* 2021;10(4).
2. Mori S, Murai Y, Ueda K, et al. Comparison of efficacy and early surgery-related complications between one-quadrant and two-quadrant microhook ab interno trabeculotomy: a propensity score matched study. *Acta Ophthalmol* 2021.
3. Omoto T, Fujishiro T, Asano-Shimizu K, et al. Comparison of 12-month surgical outcomes of ab interno trabeculotomy with phacoemulsification between spatula-shaped and dual-blade microhooks. *Jpn J Ophthalmol* 2021.
4. Aoki R, Hirooka K, Goda E, et al. Comparison of Surgical Outcomes Between Microhook Ab Interno Trabeculotomy and Goniotomy with the Kahook Dual Blade in Combination with Phacoemulsification: A Retrospective, Comparative Case Series. *Adv Ther* 2021;38(1):329-36.
5. Tojo N, Otsuka M, Hayashi A. Comparison of trabectome and microhook surgical outcomes. *Int Ophthalmol* 2021;41(1):21-6.
6. Mori S, Murai Y, Ueda K, et al. A comparison of the 1-year surgical outcomes of ab externo trabeculotomy and microhook ab interno trabeculotomy using propensity score analysis. *BMJ Open Ophthalmol* 2020;5(1):e000446.
7. Chihara E, Chihara T. Turn Back Elevation of Once Reduced IOP After Trabeculotomy Ab Externo and Kahook Dual Blade Surgeries Combined with Cataract Surgery. *Clin Ophthalmol* 2020;14:4359-68.
8. Porter M, Garza A, Gallardo M. Excisional Goniotomy in Latino Patients with Open-Angle Glaucoma: Outcomes Through 24 Months. *Clin Ophthalmol* 2020;14:3619-25.

9. ElMallah MK, Berdahl JP, Williamson BK, et al. Twelve-Month Outcomes of Stand-Alone Excisional Goniotomy in Mild to Severe Glaucoma. *Clin Ophthalmol* 2020;14:1891-7.
10. Iwasaki K, Takamura Y, Orii Y, et al. Performances of glaucoma operations with Kahook Dual Blade or iStent combined with phacoemulsification in Japanese open angle glaucoma patients. *Int J Ophthalmol* 2020;13(6):941-5.
11. Wakil SM, Birnbaum F, Vu DM, et al. Efficacy and safety of a single-use dual blade goniotomy: 18-month results. *J Cataract Refract Surg* 2020;46(10):1408-15.
12. Falkenberry S, Singh IP, Crane CJ, et al. Excisional goniotomy vs trabecular microbypass stent implantation: a prospective randomized clinical trial in eyes with mild to moderate open-angle glaucoma. *J Cataract Refract Surg* 2020;46(8):1165-71.
13. Kornmann HL, Fellman RL, Feuer WJ, et al. Early Results of Goniotomy with the Kahook Dual Blade, a Novel Device for the Treatment of Glaucoma. *Clin Ophthalmol* 2019;13:2369-76.
14. ElMallah MK, Seibold LK, Kahook MY, et al. 12-Month Retrospective Comparison of Kahook Dual Blade Excisional Goniotomy with iStent Trabecular Bypass Device Implantation in Glaucomatous Eyes at the Time of Cataract Surgery. *Adv Ther* 2019;36(9):2515-27.
15. Le C, Kazaryan S, Hubbell M, et al. Surgical Outcomes of Phacoemulsification Followed by iStent Implantation Versus Goniotomy With the Kahook Dual Blade in Patients With Mild Primary Open-angle Glaucoma With a Minimum of 12-Month Follow-up. *J Glaucoma* 2019;28(5):411-4.
16. Dorairaj SK, Seibold LK, Radcliffe NM, et al. 12-Month Outcomes of Goniotomy Performed Using the Kahook Dual Blade Combined with Cataract Surgery in Eyes with Medically Treated Glaucoma. *Adv Ther* 2018;35(9):1460-9.
17. Sieck EG, Epstein RS, Kennedy JB, et al. Outcomes of Kahook Dual Blade Goniotomy with and without Phacoemulsification Cataract Extraction. *Ophthalmol Glaucoma* 2018;1(1):75-81.
18. Sato T, Kawaji T. 12-month randomised trial of 360° and 180° Schlemm's canal incisions in suture trabeculotomy ab interno for open-angle glaucoma. *Br J Ophthalmol* 2020.
19. Yalinbas D, Dilekmen N, Hepsen IF. Comparison of Ab Externo and Ab Interno 360-degree Suture Trabeculotomy in Adult Open-angle Glaucoma. *J Glaucoma* 2020;29(11):1088-94.
20. Aktas Z, Ucgul AY, Bektas C, Sahin Karamert S. Surgical Outcomes of Prolene Gonioscopy-assisted Transluminal Trabeculotomy in Patients With Moderate to Advanced Open-Angle Glaucoma. *J Glaucoma* 2019;28(10):884-8.
21. Aktas Z, Ozmen MC, Atalay HT, Ucgul AY. Evaluation of episcleral venous fluid wave during gonioscopy assisted transluminal trabeculotomy in patients with advanced glaucoma. *Eye (Lond)* 2019;33(4):668-73.

22. Grover DS, Smith O, Fellman RL, et al. Gonioscopy-assisted Transluminal Trabeculotomy: An Ab Interno Circumferential Trabeculotomy: 24 Months Follow-up. *J Glaucoma* 2018;27(5):393-401.
23. Rahmatnejad K, Pruzan NL, Amanullah S, et al. Surgical Outcomes of Gonioscopy-assisted Transluminal Trabeculotomy (GATT) in Patients With Open-angle Glaucoma. *J Glaucoma* 2017;26(12):1137-43.
24. Grover DS, Godfrey DG, Smith O, et al. Gonioscopy-assisted transluminal trabeculotomy, ab interno trabeculotomy: technique report and preliminary results. *Ophthalmology* 2014;121(4):855-61.
25. Tojo N, Hayashi A. The Outcomes of Trabectome Surgery in Patients with Low, Middle, and High Preoperative Intraocular Pressure. *Clin Ophthalmol* 2020;14:4099-108.
26. Strzalkowska A, Strzalkowski P, Al Yousef Y, et al. Exact matching of trabectome-mediated ab interno trabeculectomy to conventional trabeculectomy with mitomycin C followed for 2 years. *Graefes Arch Clin Exp Ophthalmol* 2020.
27. Al Yousef Y, Strzalkowska A, Hillenkamp J, et al. Comparison of a second-generation trabecular bypass (iStent inject) to ab interno trabeculectomy (Trabectome) by exact matching. *Graefes Arch Clin Exp Ophthalmol* 2020;258(12):2775-80.
28. Weiner AJ, Weiner Y, Weiner A. Intraocular Pressure After Cataract Surgery Combined With Ab Interno Trabeculectomy Versus Trabecular Micro-bypass Stent: An Intrasubject Same-surgeon Comparison. *J Glaucoma* 2020;29(9):773-82.
29. Jozic L, Magner J, Funk J, Töteberg-Harms M. Success of combined cataract extraction plus excimer laser trabeculotomy exceeds that of combined ab interno trabeculectomy with the trabectome or cataract extraction alone. *Int Ophthalmol* 2020;40(3):529-37.
30. Avar M, Jordan JF, Neuburger M, et al. Long-term follow-up of intraocular pressure and pressure-lowering medication in patients after ab-interno trabeculectomy with the Trabectome. *Graefes Arch Clin Exp Ophthalmol* 2019;257(5):997-1003.
31. Ting JLM, Rudnisky CJ, Damji KF. Prospective randomized controlled trial of phaco-trabectome versus phaco-trabeculectomy in patients with open angle glaucoma. *Can J Ophthalmol* 2018;53(6):588-94.
32. Esfandiari H, Shah P, Torkian P, et al. Five-year clinical outcomes of combined phacoemulsification and trabectome surgery at a single glaucoma center. *Graefes Arch Clin Exp Ophthalmol* 2019;257(2):357-62.
33. Nazarali SA, Damji KF. Ab interno trabeculectomy with Trabectome: outcomes in African American versus Caucasian patients. *Can J Ophthalmol* 2018;53(4):361-4.
34. Dang YL, Wang X, Dai WW, et al. Two-year outcomes of ab interno trabeculectomy with the Trabectome for Chinese primary open angle glaucoma: a retrospective multicenter study. *Int J Ophthalmol* 2018;11(6):945-50.

35. Ahmed SF, Bhatt A, Schmutz M, Mosaed S. Trabectome outcomes across the spectrum of glaucoma disease severity. *Graefes Arch Clin Exp Ophthalmol* 2018;256(9):1703-10.
36. Esfandiari H, Shazly TA, Waxman SA, et al. Similar Performance of Trabectome and Ahmed Glaucoma Devices in a Propensity Score-matched Comparison. *J Glaucoma* 2018;27(6):490-5.
37. Kinoshita-Nakano E, Nakanishi H, Ohashi-Ikeda H, et al. Comparative outcomes of trabeculotomy ab externo versus trabecular ablation ab interno for open angle glaucoma. *Jpn J Ophthalmol* 2018;62(2):201-8.
38. Pahlitzsch M, Davids AM, Zorn M, et al. Three-year results of ab interno trabeculectomy (Trabectome): Berlin study group. *Graefes Arch Clin Exp Ophthalmol* 2018;256(3):611-9.
39. Okeke CO, Miller-Ellis E, Rojas M. Trabectome success factors. *Medicine (Baltimore)* 2017;96(24):e7061.
40. Akil H, Chopra V, Huang AS, et al. Short-Term Clinical Results of Ab Interno Trabeculotomy Using the Trabectome with or without Cataract Surgery for Open-Angle Glaucoma Patients of High Intraocular Pressure. *J Ophthalmol* 2017;2017:8248710.
41. Hashemian SJ, Miraftabi A, Jafari ME, Hemami MR. Combined cataract extraction and trabeculotomy by the internal approach for coexisting cataract and open-angle glaucoma. *J Curr Ophthalmol* 2017;29(1):17-22.
42. Roy P, Loewen RT, Dang Y, et al. Stratification of phaco-trabectome surgery results using a glaucoma severity index in a retrospective analysis. *BMC Ophthalmol* 2017;17(1):30.
43. Kurji K, Rudnisky CJ, Rayat JS, et al. Phaco-trabectome versus phaco-iStent in patients with open-angle glaucoma. *Can J Ophthalmol* 2017;52(1):99-106.
44. Gonnermann J, Bertelmann E, Pahlitzsch M, et al. Contralateral eye comparison study in MICS & MIGS: Trabectome® vs. iStent inject®. *Graefes Arch Clin Exp Ophthalmol* 2017;255(2):359-65.
45. Dang Y, Roy P, Bussel, II, et al. Combined analysis of trabectome and phaco-trabectome outcomes by glaucoma severity. *F1000Res* 2016;5:762.
46. Loewen RT, Roy P, Parikh HA, et al. Impact of a Glaucoma Severity Index on Results of Trabectome Surgery: Larger Pressure Reduction in More Severe Glaucoma. *PLoS One* 2016;11(3):e0151926.
47. Shoji N, Kasahara M, Iijima A, et al. Short-term evaluation of Trabectome surgery performed on Japanese patients with open-angle glaucoma. *Jpn J Ophthalmol* 2016;60(3):156-65.
48. Parikh HA, Bussel, II, Schuman JS, et al. Coarsened Exact Matching of Phaco-Trabectome to Trabectome in Phakic Patients: Lack of Additional Pressure Reduction from Phacoemulsification. *PLoS One* 2016;11(2):e0149384.
49. Yildirim Y, Kar T, Duzgun E, et al. Evaluation of the long-term results of trabectome surgery. *Int Ophthalmol* 2016;36(5):719-26.

50. Mizoguchi T, Nishigaki S, Sato T, et al. Clinical results of Trabectome surgery for open-angle glaucoma. *Clin Ophthalmol* 2015;9:1889-94.
51. Fellman RL, Feuer WJ, Grover DS. Episcleral Venous Fluid Wave Correlates with Trabectome Outcomes: Intraoperative Evaluation of the Trabecular Outflow Pathway. *Ophthalmology* 2015;122(12):2385-91.e1.
52. Bussel, II, Kaplowitz K, Schuman JS, Loewen NA. Outcomes of ab interno trabeculectomy with the trabectome by degree of angle opening. *Br J Ophthalmol* 2015;99(7):914-9.
53. Ahuja Y, Ma Khin Pyi S, Malihi M, et al. Clinical results of ab interno trabeculotomy using the trabectome for open-angle glaucoma: the Mayo Clinic series in Rochester, Minnesota. *Am J Ophthalmol* 2013;156(5):927-35.e2.
54. Ting JL, Damji KF, Stiles MC. Ab interno trabeculectomy: outcomes in exfoliation versus primary open-angle glaucoma. *J Cataract Refract Surg* 2012;38(2):315-23.
55. Francis BA, Minckler D, Dustin L, et al. Combined cataract extraction and trabeculotomy by the internal approach for coexisting cataract and open-angle glaucoma: initial results. *J Cataract Refract Surg* 2008;34(7):1096-103.
56. Minckler D, Mosaed S, Dustin L, Ms BF. Trabectome (trabeculectomy-internal approach): additional experience and extended follow-up. *Trans Am Ophthalmol Soc* 2008;106:149-59; discussion 59-60.
57. Minckler D, Baerveldt G, Ramirez MA, et al. Clinical results with the Trabectome, a novel surgical device for treatment of open-angle glaucoma. *Trans Am Ophthalmol Soc* 2006;104:40-50.
58. Minckler DS, Baerveldt G, Alfaro MR, Francis BA. Clinical results with the Trabectome for treatment of open-angle glaucoma. *Ophthalmology* 2005;112(6):962-7.
